# Supplementary material
Source: PubMed Central journal article supplement (PMC6037608)
Supplement: NIHMS975897-supplement-supplement_1.pdf [file NIHMS975897-supplement-supplement_1.pdf]

## Supplemental tables

**Supplemental table 1: The ICD-9 codes for sickle cell disease case identification.**

| <b>Inclusion Criteria</b>                                                                                                                                                                                                                       | <b>ICD-9</b>                 | <b>Comments</b>                             |
|-------------------------------------------------------------------------------------------------------------------------------------------------------------------------------------------------------------------------------------------------|------------------------------|---------------------------------------------|
| At least one inpatient admission with a qualifying diagnosis of sickle cell disease ICD-9CM codes made as discharge diagnosis OR two outpatient visits with a qualifying diagnosis of sickle cell disease ICD-9CM codes at least 30 days apart. | 282.41                       | Sickle cell beta thalassemia without crisis |
|                                                                                                                                                                                                                                                 | 282.42                       | Sickle cell beta thalassemia with crisis    |
|                                                                                                                                                                                                                                                 | 282.60                       | Sickle-cell disease, unspecified            |
|                                                                                                                                                                                                                                                 | 282.61                       | Hb-SS disease without crisis                |
|                                                                                                                                                                                                                                                 | 282.62                       | Hb-SS disease with crisis                   |
|                                                                                                                                                                                                                                                 | 282.63                       | Sickle-cell/Hb-C disease without crisis     |
|                                                                                                                                                                                                                                                 | 282.64                       | Sickle-cell/Hb-C disease with crisis        |
|                                                                                                                                                                                                                                                 | 282.68                       | Other sickle-cell disease without crisis    |
|                                                                                                                                                                                                                                                 | 282.69                       | Other sickle-cell disease with crisis       |
| <b>Exclusion criteria</b>                                                                                                                                                                                                                       |                              |                                             |
| If diagnoses for sickle cell trait presented at any diagnosis field                                                                                                                                                                             | 282.5                        | Sickle-cell trait                           |
| <b>Additional exclusion criteria</b>                                                                                                                                                                                                            |                              |                                             |
| Cancer                                                                                                                                                                                                                                          | 140–209                      |                                             |
| Solid organ transplantation                                                                                                                                                                                                                     | V420, V421, V427, V432, V438 |                                             |
| Hematopoietic stem cell transplantation                                                                                                                                                                                                         | V42.81, V42.82               |                                             |

**Supplemental table 2: Codes used to identify medication history, medical condition and history of procedures resulting from an inpatient, outpatient or emergency room (ER) encounters. (RuSH Algorithm)**

| <b>Diagnosis</b>                                 | <b>Code type</b>       | <b>Code</b>                                                                        |
|--------------------------------------------------|------------------------|------------------------------------------------------------------------------------|
| Sickle cell disease                              | ICD-9CM diagnosis      | 282.6, 282.60, 282.61, 282.62, 282.63, 282.63, 282.64, 282.68, 282.69              |
| <b>Sickle cell disease-related treatments</b>    |                        |                                                                                    |
| Hydroxycarbamide                                 | NDC codes              | <b>Redbook reference</b>                                                           |
| Opioid analgesics                                | NDC codes              |                                                                                    |
| Iron Chelators                                   | NDC codes              |                                                                                    |
| Erythropoietin                                   | NDC codes              |                                                                                    |
| Folic acid                                       | NDC codes              |                                                                                    |
| <b>Sickle cell disease-related procedures</b>    |                        |                                                                                    |
| Transfusion                                      | UB-92 Revenue Code     | 0380-0391, 0399                                                                    |
|                                                  | CPT-4 Procedure Code   | 36430, 36455                                                                       |
|                                                  | HCPCS Code             | P9010, P9011, P9016, P9021, P9022, P9038, P9039, P9040, P9051, P9054, P9057, P9058 |
|                                                  | ICD-9CM Procedure Code | 99.0, 99.01, 99.02                                                                 |
| Splenectomy                                      | ICD-9CM diagnosis      | 41.43, 41.5                                                                        |
|                                                  | CPT-4 Procedure Code   | 38100, 38101, 38120                                                                |
| Cholecystectomy                                  | ICD-9CM diagnosis      | 575.0                                                                              |
|                                                  | CPT-4 Procedure Code   | 47562, 47600                                                                       |
| Transcranial Doppler                             | ICD-9CM diagnosis      | 88.71                                                                              |
|                                                  | CPT-4 Procedure Code   | 93886                                                                              |
| <b>Sickle cell disease-related complications</b> |                        |                                                                                    |

|                           |                   |                                                                                                                |
|---------------------------|-------------------|----------------------------------------------------------------------------------------------------------------|
| Vaso-occlusive crisis     | ICD-9CM diagnosis | 282.42, 282.62, 282.64, 282.69                                                                                 |
| Chronic renal disease     | ICD-9CM diagnosis | 585.1, 585.2, 585.3, 791.0                                                                                     |
| Pneumonia                 | ICD-9CM diagnosis | 480.0-508.9; 486.0                                                                                             |
| Acute chest syndrome      | ICD-9CM diagnosis | 517.3                                                                                                          |
| Pulmonary hypertension    | ICD-9CM diagnosis | 415.0, 416.0; 416.8                                                                                            |
| Stroke                    | ICD-9CM diagnosis | 430, 431, 432, 433.01, 433.11, 433.21, 433.31, 433.41, 433.51, 433.61, 433.71, 433.81, 433.91, 434, <b>436</b> |
| Priapism                  | ICD-9CM diagnosis | 607.3                                                                                                          |
| Iron overload             | ICD-9CM diagnosis | 275.0                                                                                                          |
| Gallstones/cholelithiasis | ICD-9CM diagnosis | 574, 575.10                                                                                                    |
| Avascular necrosis        | ICD-9CM diagnosis | 733.40-733.44, 733.49                                                                                          |
| Retinal disease           | ICD-9CM diagnosis | 362.9                                                                                                          |
| Splenomegaly              | ICD-9CM diagnosis | 759.0, 789.2                                                                                                   |
| Splenic sequestration     | ICD-9CM diagnosis | 289.52                                                                                                         |
| Hypersplenism             | ICD-9CM diagnosis | 289.4                                                                                                          |
| Leg ulcers                | ICD-9CM diagnosis | 707.10                                                                                                         |
| Dactylitis                | ICD-9CM diagnosis | 730.1, 095.5, 015.5                                                                                            |
| Osteomyelitis             | ICD-9CM diagnosis | 730.0, 730.1, 730.2                                                                                            |

UB-92, Uniform/Universal Billing form 92; CPT-4, current procedural terminology codes; HCPCS, Healthcare Common Procedure Coding System; ICD-9 CM, International Classification of Diseases, Ninth Revision, Clinical Modification;

**Supplemental table 3: Codes used to identify healthcare utilization and sickle cell disease-related complications.**

| Diagnosis                          | Code type                  | Code                                                                                                                                                                   |
|------------------------------------|----------------------------|------------------------------------------------------------------------------------------------------------------------------------------------------------------------|
| ER visit                           | Procedure Group Code       | 110, 111, 114                                                                                                                                                          |
|                                    | Revenue Code               | 0450-0452, 0456, 0459, 0981                                                                                                                                            |
|                                    | Place of Service Code      | 23, 220, 428                                                                                                                                                           |
|                                    | Service Sub-Category Code  | 10120, 10420, 10320, 10220, 12220, 20220, 10520, 20120, 21120, 21220, 22320, 22120, 30220, 30120, 30420, 30320, 30520, 30620, 31120, 31420, 31320, 31520, 31220, 31620 |
| Whole blood transfusion            | CPT-4/HCPCS Procedure Code | P9010, P9011, P9051, P9054, P9056                                                                                                                                      |
|                                    | ICD-9 CM Procedure         | 99.03                                                                                                                                                                  |
|                                    | ICD-9 CM Diagnosis         | V58.2                                                                                                                                                                  |
| Packed red blood cells transfusion | CPT-4/HCPCS Procedure Code | P9016, P9021, P9022, P9038-P9040, P9057, P9058                                                                                                                         |
|                                    | ICD-9 CM Procedure         | 99.04                                                                                                                                                                  |
| Asthma                             | ICD-9CM diagnosis          | 493                                                                                                                                                                    |
| Pneumonia                          | ICD-9CM diagnosis          | 480-488                                                                                                                                                                |
| Vaso-occlusive crisis              | ICD-9CM diagnosis          | 282.42, 282.62, 282.64, 282.69                                                                                                                                         |
| Chronic renal disease              | ICD-9CM diagnosis          | 585.1, 585.2, 585.3, 791.0                                                                                                                                             |
| Pneumonia                          | ICD-9CM diagnosis          | 480.0-508.9; 486.0                                                                                                                                                     |
| Acute chest syndrome               | ICD-9CM diagnosis          | 517.3                                                                                                                                                                  |
| Pulmonary hypertension             | ICD-9CM diagnosis          | 415.0, 416.0; 416.8                                                                                                                                                    |

|                            |                   |                                                                                                         |
|----------------------------|-------------------|---------------------------------------------------------------------------------------------------------|
| Stroke                     | ICD-9CM diagnosis | 430, 431, 432, 433.01, 433.11, 433.21, 433.31, 433.41, 433.51, 433.61, 433.71, 433.81, 433.91, 434, 436 |
| Priapism                   | ICD-9CM diagnosis | 607.3                                                                                                   |
| Iron overload              | ICD-9CM diagnosis | 275.0                                                                                                   |
| Gallstones/ cholelithiasis | ICD-9CM diagnosis | 574, 575.10                                                                                             |
| Avascular necrosis         | ICD-9CM diagnosis | 733.40-733.44, 733.49                                                                                   |
| Retinal disease            | ICD-9CM diagnosis | 362.9                                                                                                   |
| Splenomegaly               | ICD-9CM diagnosis | 759.0, 789.2                                                                                            |
| Splenic sequestration      | ICD-9CM diagnosis | 289.52                                                                                                  |
| Hypersplenism              | ICD-9CM diagnosis | 289.4                                                                                                   |
| Leg ulcers                 | ICD-9CM diagnosis | 707.10                                                                                                  |
| Dactylitis                 | ICD-9CM diagnosis | 730.1, 095.5, 015.5                                                                                     |
| Osteomyelitis              | ICD-9CM diagnosis | 730.0, 730.1, 730.2                                                                                     |

UB-92, Uniform/Universal Billing form 92; CPT-4, current procedural terminology codes; HCPCS, Healthcare Common Procedure Coding System; ICD-9 CM, International Classification of Diseases, Ninth Revision, Clinical Modification

**Supplemental table 4:** Multivariate analysis of the **whole adult cohort** on effects of any hydroxycarbamide exposure on all-cause 30-day readmission (subgroup analysis)

| Characteristics                          | Hydroxycarbamide <b>not-exposed</b> in the past 6 months before hospitalization (n=11,247) | Hydroxycarbamide exposed in the past 6 months before hospitalization (n=3,643) | 95% CI |      | p-value |
|------------------------------------------|--------------------------------------------------------------------------------------------|--------------------------------------------------------------------------------|--------|------|---------|
|                                          |                                                                                            |                                                                                | OR     |      |         |
| <b>Hydroxycarbamide exposure</b>         |                                                                                            | 1.07                                                                           | 0.90   | 1.27 | 0.4362  |
| <b>Demographic characteristics</b>       |                                                                                            |                                                                                |        |      |         |
| Male vs. Female                          |                                                                                            | 1.00                                                                           | 0.83   | 1.22 | 0.962   |
| Age                                      |                                                                                            | 0.98                                                                           | 0.98   | 0.99 | <.0001  |
| <b>Hospitalization-related variables</b> |                                                                                            |                                                                                |        |      |         |
| Length of stay (Days)                    |                                                                                            | 1.01                                                                           | 1.00   | 1.02 | 0.0122  |
| Concomitant ACS or pneumonia diagnosis   |                                                                                            | 0.79                                                                           | 0.70   | 0.89 | 0.0002  |
| Concomitant asthma diagnosis             |                                                                                            | 1.06                                                                           | 0.88   | 1.27 | 0.5485  |
| Received transfusion                     |                                                                                            | 0.82                                                                           | 0.72   | 0.95 | 0.0066  |
| <b>Year of admission</b>                 |                                                                                            |                                                                                |        |      |         |
| 2009                                     |                                                                                            | 1.15                                                                           | 0.92   | 1.43 | 0.2187  |
| 2010                                     |                                                                                            | 1.30                                                                           | 1.06   | 1.61 | 0.0139  |
| 2011                                     |                                                                                            | 1.26                                                                           | 1.03   | 1.53 | 0.0232  |
| 2012                                     |                                                                                            | 1.26                                                                           | 1.05   | 1.51 | 0.0142  |
| 2013                                     |                                                                                            | 1.17                                                                           | 0.99   | 1.38 | 0.0589  |
| 2014                                     |                                                                                            | (Reference)                                                                    |        |      |         |
| <b>Season of admission</b>               |                                                                                            |                                                                                |        |      |         |
| Fall (Sep-Nov)                           |                                                                                            | 1.02                                                                           | 0.91   | 1.14 | 0.7332  |
| Spring (Mar-May)                         |                                                                                            | 0.90                                                                           | 0.81   | 1.01 | 0.0777  |
| Summer (Jun-Aug)                         |                                                                                            | 0.97                                                                           | 0.87   | 1.08 | 0.5354  |
| Winter (Dec-Feb)                         |                                                                                            | (Reference)                                                                    |        |      |         |
| <b>Weekend discharge</b>                 |                                                                                            | 1.09                                                                           | 0.99   | 1.20 | 0.0843  |

| Baseline concomitant medication exposure and acute care use |  |      |      |      |        |
|-------------------------------------------------------------|--|------|------|------|--------|
| NSAIDs                                                      |  | 0.83 | 0.71 | 0.97 | 0.0187 |
| Opioids (in OME)                                            |  | 1.00 | 1.00 | 1.00 | 0.1622 |
| Admitted in the 6-month baseline period                     |  | 1.67 | 1.47 | 1.90 | <.0001 |
| ER visits in the 6-month baseline period                    |  | 1.58 | 1.39 | 1.80 | <.0001 |

ACS, acute chest syndrome; OME, oral morphine equivalent; NSAIDs, Nonsteroidal anti-inflammatory drugs; ER, emergency room

**Supplemental table 5:. Multivariate analysis of the effects of any hydroxycarbamide exposure on all-cause 30-day readmission**

| Characteristics                          | Hydroxycarbamide <b>unexposed</b> hospitalization (n=16,194) | Hydroxycarbamide exposed hospitalization (n=4,527) | 95% CI |      | P-value |
|------------------------------------------|--------------------------------------------------------------|----------------------------------------------------|--------|------|---------|
|                                          |                                                              |                                                    | OR     |      |         |
|                                          |                                                              | OR                                                 | 95% CI |      | P-value |
| <b>Hydroxycarbamide exposure</b>         |                                                              | 1.12                                               | 0.96   | 1.31 | 0.138   |
| <b>Demographic characteristics</b>       |                                                              |                                                    |        |      |         |
| Male vs. Female                          |                                                              | 0.98                                               | 0.83   | 1.15 | 0.8175  |
| Age                                      |                                                              | 1.00                                               | 1.00   | 1.00 | 0.2712  |
| <b>Hospitalization-related variables</b> |                                                              |                                                    |        |      |         |
| Length of stay (Days)                    |                                                              | 1.01                                               | 1.01   | 1.02 | 0.0001  |
| Concomitant ACS or pneumonia diagnosis   |                                                              | 0.70                                               | 0.63   | 0.78 | <.0001  |
| Concomitant asthma diagnosis             |                                                              | 1.03                                               | 0.88   | 1.19 | 0.731   |
| Received transfusion                     |                                                              | 0.84                                               | 0.74   | 0.95 | 0.005   |
| <b>Year of admission</b>                 |                                                              |                                                    |        |      |         |
| 2009                                     |                                                              | 1.11                                               | 0.92   | 1.34 | 0.2806  |
| 2010                                     |                                                              | 1.22                                               | 1.02   | 1.46 | 0.0262  |
| 2011                                     |                                                              | 1.14                                               | 0.96   | 1.35 | 0.1348  |
| 2012                                     |                                                              | 1.14                                               | 0.97   | 1.34 | 0.0994  |
| 2013                                     |                                                              | 1.15                                               | 1.00   | 1.33 | 0.0512  |
| 2014                                     | (Reference)                                                  | 1.00                                               | 1.00   | 1.00 |         |
| <b>Season of admission</b>               |                                                              |                                                    |        |      |         |
| Fall (Sep-Nov)                           |                                                              | 1.07                                               | 0.97   | 1.18 | 0.1621  |
| Spring (Mar-May)                         |                                                              | 0.97                                               | 0.87   | 1.07 | 0.5008  |
| Summer (Jun-Aug)                         |                                                              | 1.01                                               | 0.91   | 1.11 | 0.9169  |
| Winter (Dec-Feb)                         | (Reference)                                                  | 1.00                                               | 1.00   | 1.00 |         |
| <b>Weekend discharge</b>                 |                                                              | 1.05                                               | 0.97   | 1.15 | 0.2475  |
| NSAIDs                                   |                                                              | 1.00                                               | 0.88   | 1.15 | 0.9747  |
| Opioids (in OME)                         |                                                              | 1.00                                               | 1.00   | 1.00 | 0.1842  |
| Admitted in the 6-month baseline period  |                                                              | 1.70                                               | 1.52   | 1.90 | <.0001  |
| ER visits in the 6-month baseline period |                                                              | 1.52                                               | 1.36   | 1.70 | <.0001  |

ACS, acute chest syndrome; NSAIDs, Nonsteroidal anti-inflammatory drugs; OME, oral morphine equivalent; ER, emergency room;
